# Supplementary material for: One-step solid-phase boronation to fabricate self-supported porous FeNiB/FeNi foam for efficient electrocatalytic oxygen evolution and overall water splitting
Source: Royal Society of Chemistry journal article supplement (doi:10.1039/c9ta04076e), 2019-01-01
Supplement: c9ta04076e1.pdf [file c9ta04076e1.pdf]

**Supporting Information :**

**One-Step Solid-phase Boronation to Fabricate Self-Supported  
Porous FeNiB/FeNi Foam for Efficient Electrocatalytic Oxygen  
Evolution and Overall Water Splitting**

Hefeng Yuan,<sup>a</sup> Shumin Wang,<sup>a</sup> Xundi Gu,<sup>a</sup> Bin Tang,<sup>a</sup> Jinping Li,<sup>\*b</sup> and Xiaoguang Wang <sup>\*ab</sup>

<sup>a</sup> *Laboratory of Advanced Materials and Energy Electrochemistry, Research Institute of Surface Engineering, Taiyuan University of Technology, Taiyuan, 030024, China.*

<sup>b</sup> *Shanxi Key Laboratory of Gas Energy Efficient and Clean Utilization, Taiyuan, Shanxi, 030024, China*

## Figures:

**Figure S1** (a) SEM image and (b) corresponding EDX spectrum of FeNi foam.

**Figure S2** XRD pattern of FeNi foam.

**Figure S3** XRD patterns of (a) FeNi@FeNiB-600, (b) FeNi@FeNiB-800 and (c) FeNi@FeNiB-900.

**Figure S4** (a-c) SEM images of FeNi@FeNiB-600 at different magnifications. EDX analysis on the zones of (d) agglomerated particles and (e) smooth bottom surface of FeNi@FeNiB-600. Inset: corresponding SEM images.

**Figure S5** (a,d) SEM images on different area of FeNi@FeNiB-800. (b,c) high-magnification SEM images of different area from (a). (e,f) High-magnification SEM images of different area from (d). (g,h) EDX analysis on different area of FeNi@FeNiB-800. Inset: corresponding SEM images.

**Figure S6** (a-c) SEM images of FeNi@FeNiB-900 at different magnifications. (d,e) EDX analysis on different area of FeNi@FeNiB-900. Inset: corresponding SEM images.

**Figure S7** Cross-section SEM images of (a) FeNi@FeNiB-600, (b) FeNi@FeNiB-700, (c) FeNi@FeNiB-800 and (d) FeNi@FeNiB-900.

**Figure S8** XPS survey profiles for as-prepared FeNi@FeNiB-700.

**Figure S9** Overpotential at 10 mA cm<sup>-2</sup> and Tafel slope of state-of-the-art noble-metal-free OER electrocatalysts in 1.0 M KOH from Table S1.

**Figure S10** Cyclic voltammogram in the double layer region at the scan rate of 5, 10, 20, 40, 60, 80 and 100 mV s<sup>-1</sup> of (a) FeNi foam, (b) FeNi@FeNiB-600, (c) FeNi@FeNiB-700, (d) FeNi@FeNiB-800 and (e) FeNi@FeNiB-900.

**Figure S11** Nyquist plots of FeNi foam, FeNi@FeNiB-600, FeNi@FeNiB-700, FeNi@FeNiB-800 and FeNi@FeNiB-900 in 1.0 M KOH under the potentials of (a) 1.23 V (vs. RHE) and (b) 1.40 V (vs. RHE), respectively.

**Figure S12** Equivalent circuit used for fitting the Nyquist plots.

**Figure S13** (a) Cyclic voltammograms of FeNi@FeNiB-700 at different scan rates increasing from 5 mV s<sup>-1</sup> to 30 mV s<sup>-1</sup> in 1.0 M KOH. (b) Corresponding plots of

oxidation peak current versus scan rate on FeNi@FeNiB-700.

**Figure S14.** The digital images of electrolyte (a) before and (b) after long-term OER characterization.

**Figure S15** The amount of gas theoretically calculated and experimentally measured versus time for FeNi@FeNiB-700.

**Figure S16** (a) Comparison of XRD spectra of original FeNi@FeNiB-700 and post-tested FeNi@FeNiB-700 with chronopotentiometric (CP) test for 12 h. (b) Detailed XRD pattern of FeNi@FeNiB-700-CP.

**Figure S17** XPS survey profiles for FeNi@FeNiB-700 after OER stability test.

**Figure S18** High resolution XPS spectra of the (a) Fe 2p, (b) Ni 2p, (c) B 1s and (d) O 1s for FeNi@FeNiB-700 after long-term stability test.

**Figure S19** DFT calculations: (a-c) are the models of Ni<sub>2</sub>B, Ni<sub>4</sub>B<sub>3</sub> and Fe-Ni<sub>4</sub>B<sub>3</sub>; (d-f) are the models of O-adsorbed Ni<sub>2</sub>B, Ni<sub>4</sub>B<sub>3</sub> and Fe-Ni<sub>4</sub>B<sub>3</sub>. (Blue: Ni, purple: Fe, pink: B, red: O)

**Figure S20** Polarization curves of FeNi@FeNiB-700, FeNi foam, CoNi foam, Ni foam, FeNi-P foam, CoNi-P foam, Ni-P foam and Pt/C toward the HER in 1.0 M KOH solution.

## Tables:

**Table S1** Comparison of Tafel slope and required overpotential at 10 mA cm<sup>-2</sup> ( $\eta_{10}$ ) for FeNi@FeNiB-700 with many of reported state-of-the-art noble metal free OER electrocatalysts in alkaline media.

**Table S2** EIS parameters ( $R_s$  and  $R_{ct}$ ) of FeNi@FeNiB-X (X=600,700,800,900) at controlled-potentials of 1.23 V, 1.40 V and 1.50 V vs. RHE, respectively.

**Table S3** Quantitative analysis of original FeNi@FeNiB-700 and post-tested FeNi@FeNiB-700 for 12 h from XPS measurements.

## **DFT calculations**

Based on the first-principle calculation, all theoretical calculations were performed on the plane-wave software code VASP (Vienna Ab Initio Simulation Package).<sup>1-3</sup> The projector augmented wave (PAW) model with the Perdew–Burke–Ernzerhof (PBE) generalized gradient approximation (GGA) exchange–correlation functional was employed to describe the interactions between core and electrons.<sup>4</sup> The convergence threshold for structural optimization was set as  $10^{-5}$  eV in energy and -0.05 eV in force. Considering the plane-wave basis restriction, the cutoff energy was set as 450 eV. Meanwhile, the Brillouin zone was sampled with the Monkhorst–Pack scheme. Monkhorst–Pack k-point setups were  $3 \times 3 \times 3$  and  $3 \times 3 \times 1$  for bulk and slab geometry optimization, respectively.

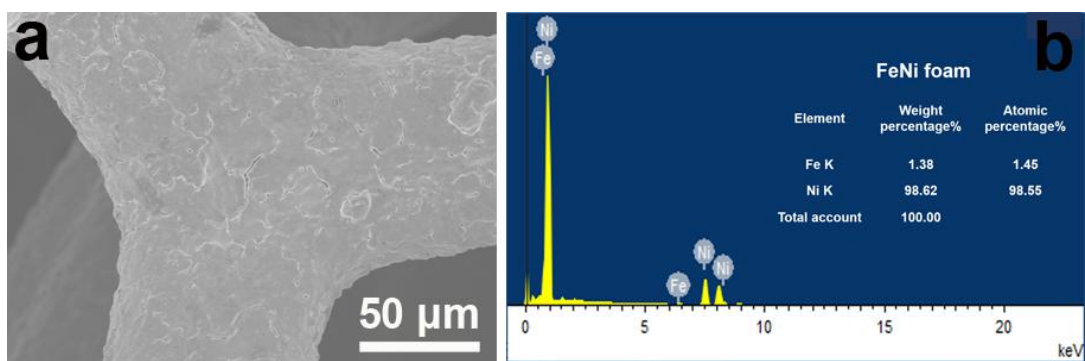

**Figure S1.** (a) SEM image and (b) corresponding EDX spectrum of FeNi foam.

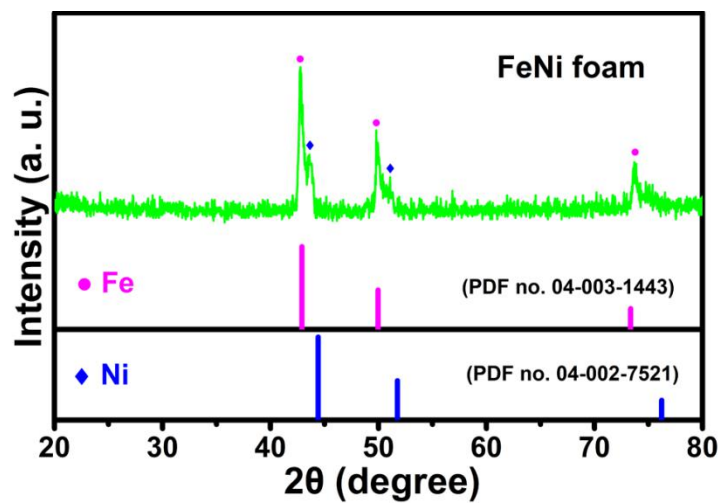

**Figure S2.** XRD pattern of FeNi foam.

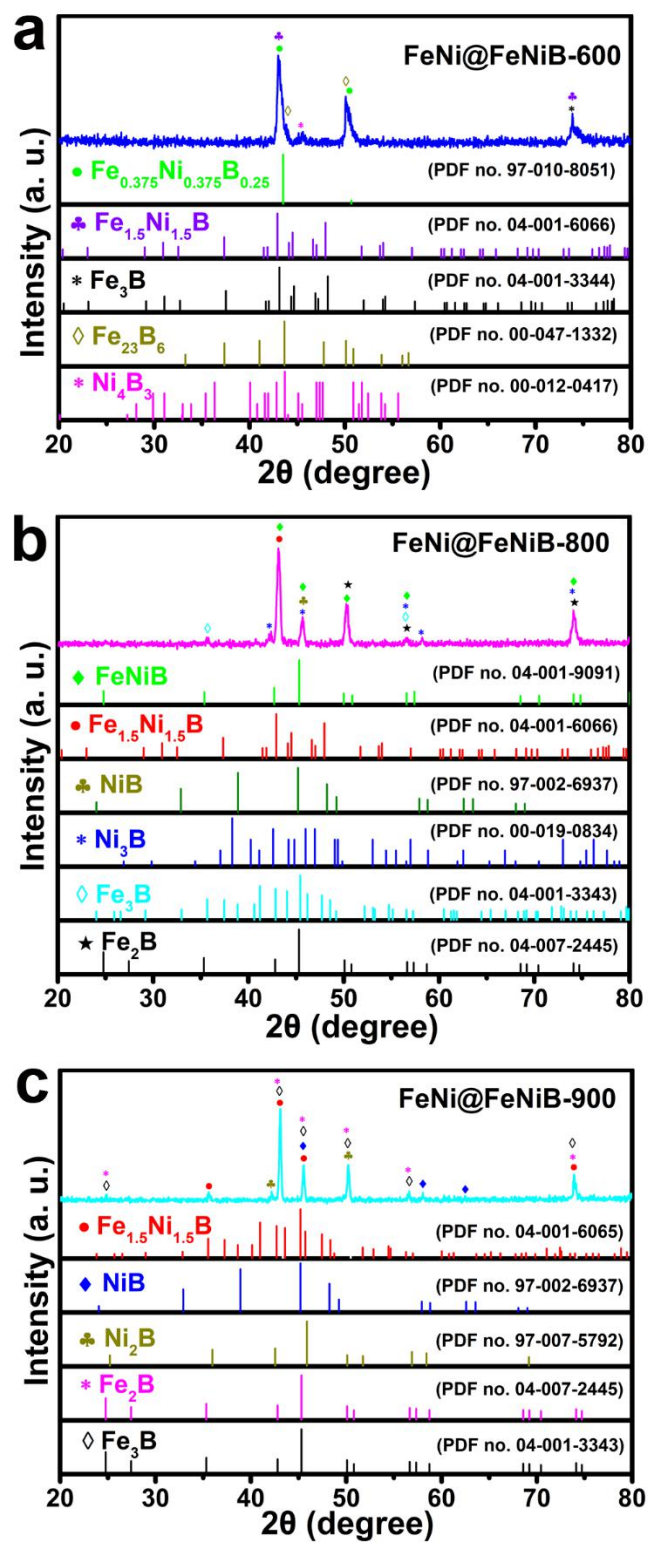

**Figure S3.** XRD patterns of (a) FeNi@FeNiB-600, (b) FeNi@FeNiB-800 and (c) FeNi@FeNiB-900.

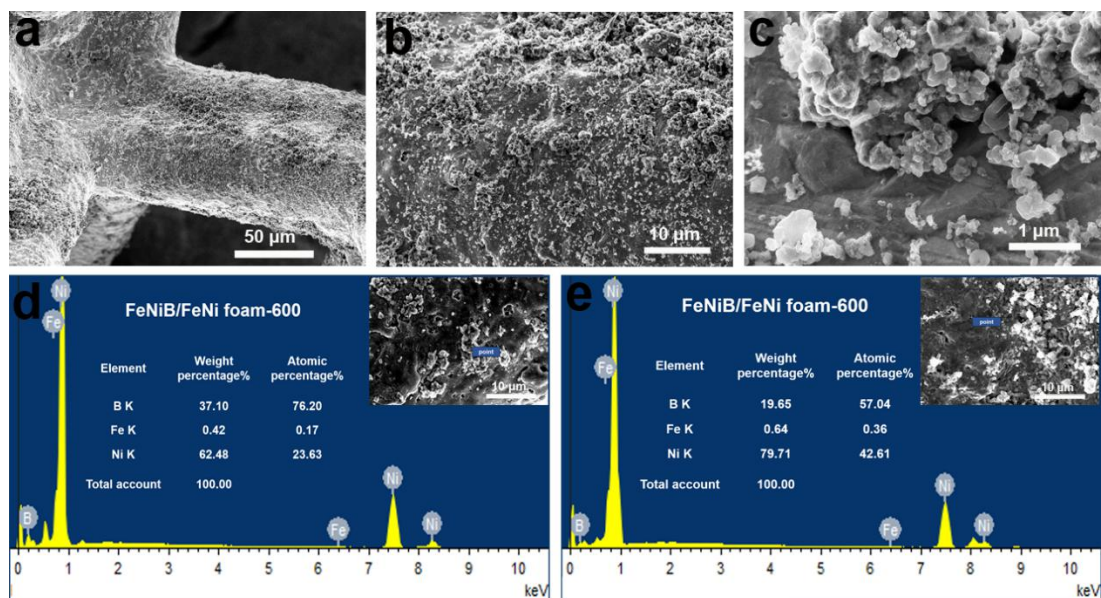

**Figure S4.** (a-c) SEM images of FeNi@FeNiB-600 at different magnifications. EDX analysis on the zones of (d) agglomerated particles and (e) smooth bottom surface of FeNi@FeNiB-600. Inset: corresponding SEM images.

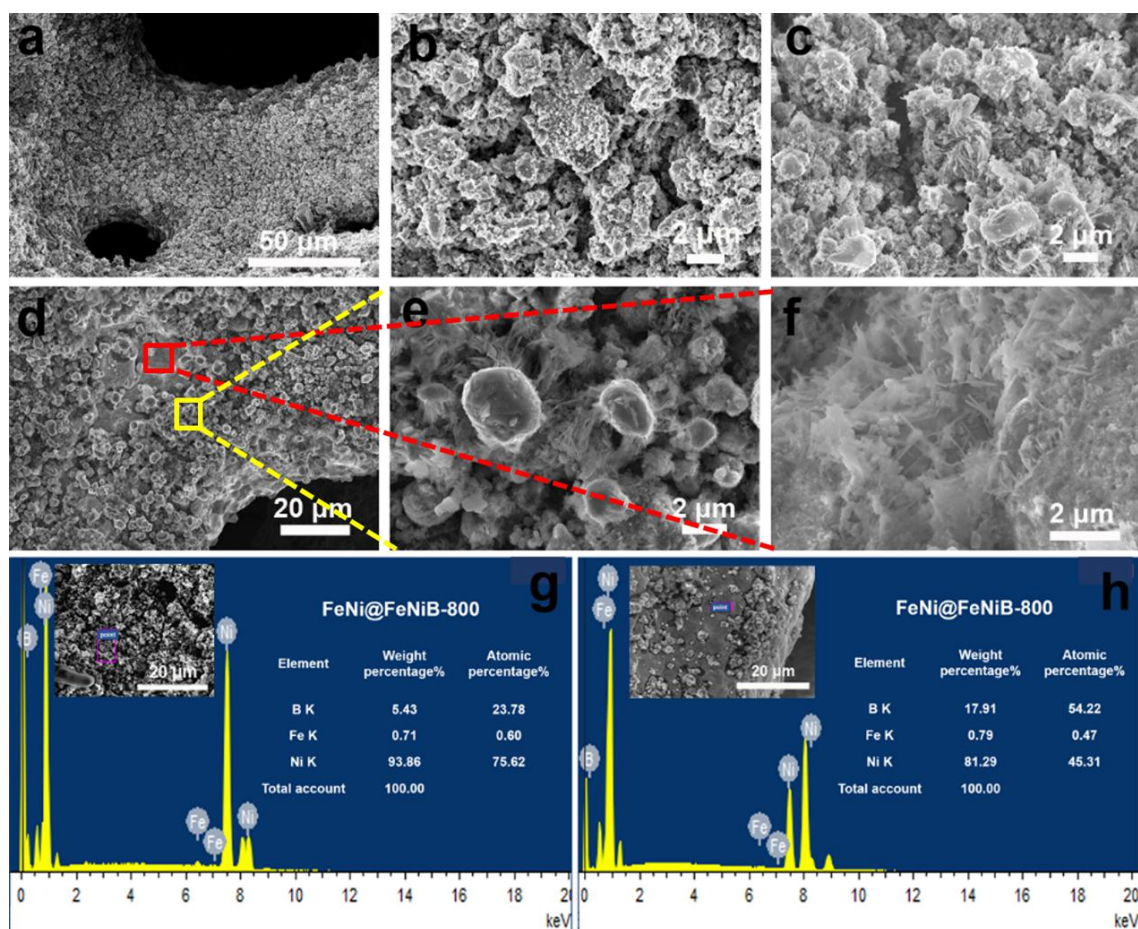

**Figure S5.** (a,d) SEM images on different area of FeNi@FeNiB-800. (b,c) high-magnification SEM images of different area from (a). (e,f) High-magnification SEM images of different area from (d). (g,h) EDX analysis on different area of FeNi@FeNiB-800. Inset: corresponding SEM images.



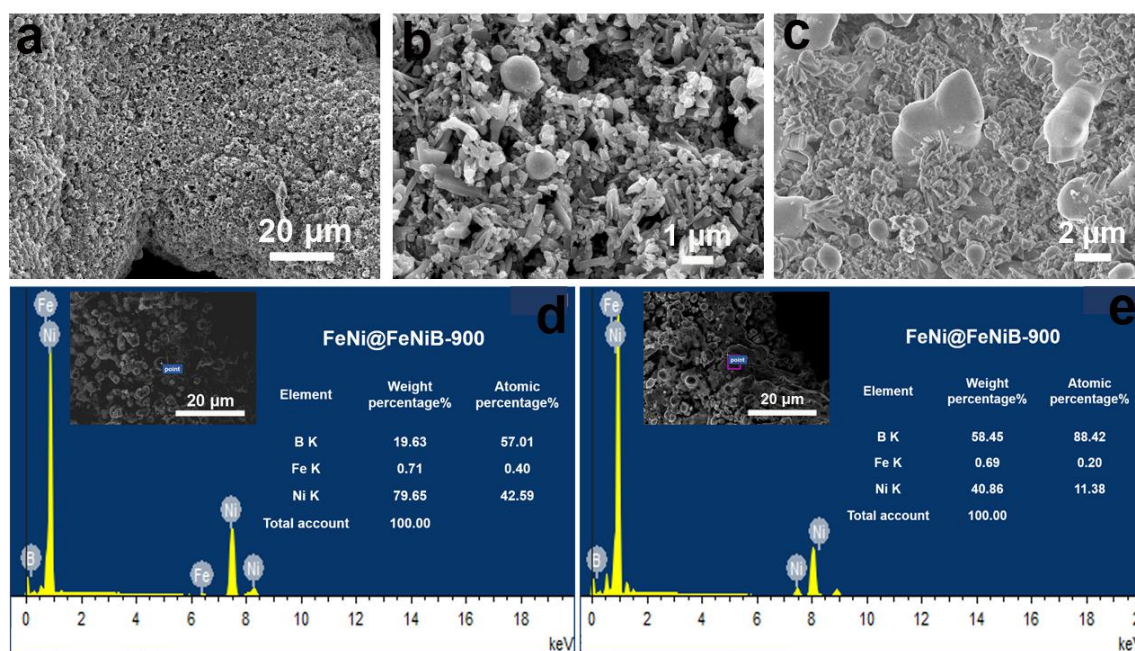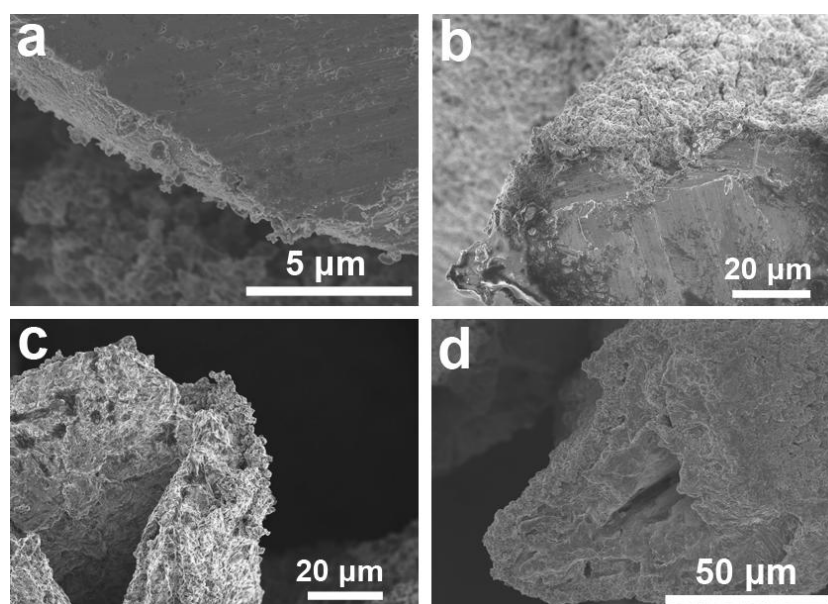

**Figure S7.** Cross-section SEM images of (a) FeNi@FeNiB-600, (b) FeNi@FeNiB-700, (c) FeNi@FeNiB-800 and (d) FeNi@FeNiB-900.

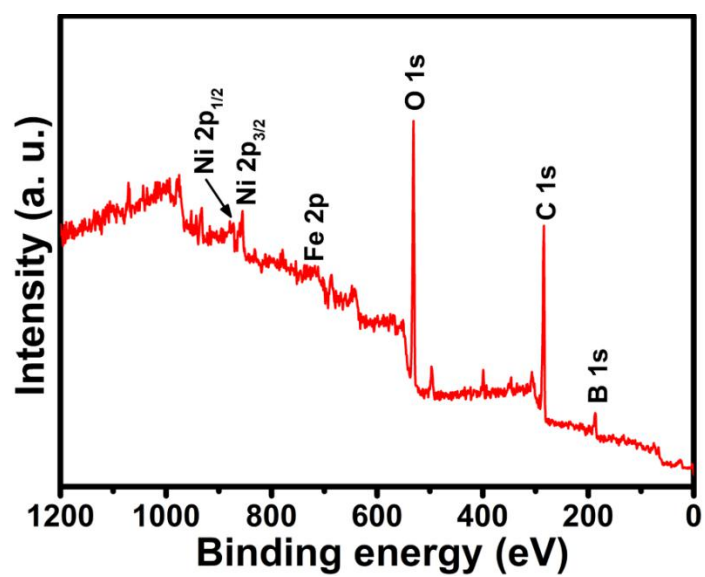

**Figure S8.** XPS survey profiles for as-prepared FeNi@FeNiB-700.

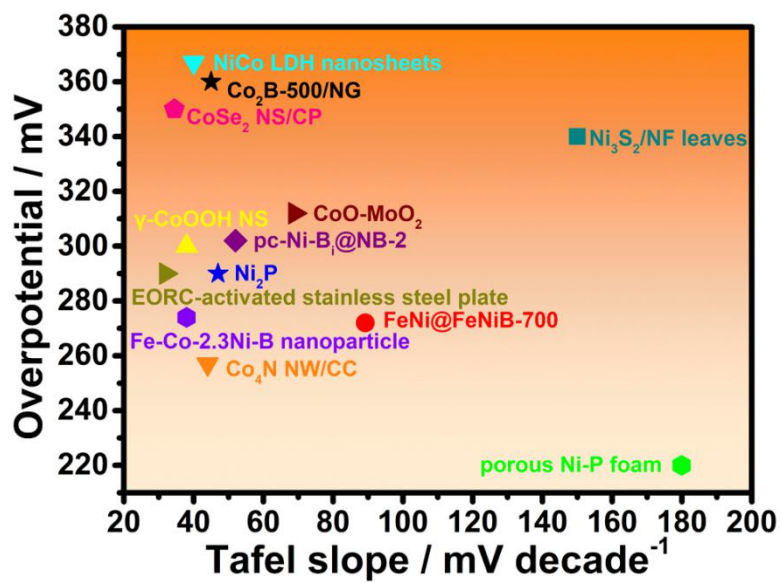

**Figure S9.** Overpotential at 10 mA cm<sup>-2</sup> and Tafel slope of state-of-the-art noble-metal-free OER electrocatalysts in 1.0 M KOH from Table S1.

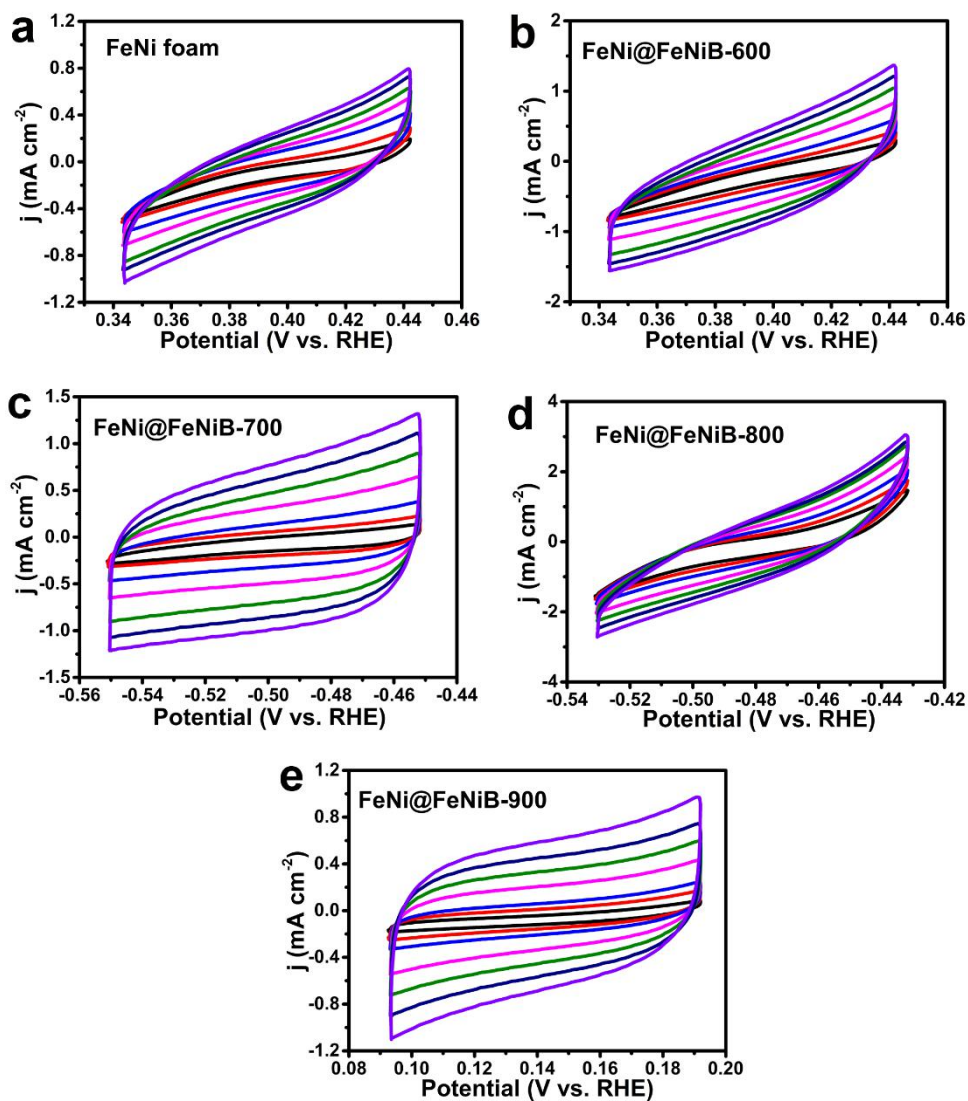

**Figure S10.** Cyclic voltammogram in the double layer region at the scan rate of 5, 10, 20, 40, 60, 80 and 100 mV s<sup>-1</sup> of (a) FeNi foam, (b) FeNi@FeNiB-600, (c) FeNi@FeNiB-700, (d) FeNi@FeNiB-800 and (e) FeNi@FeNiB-900.

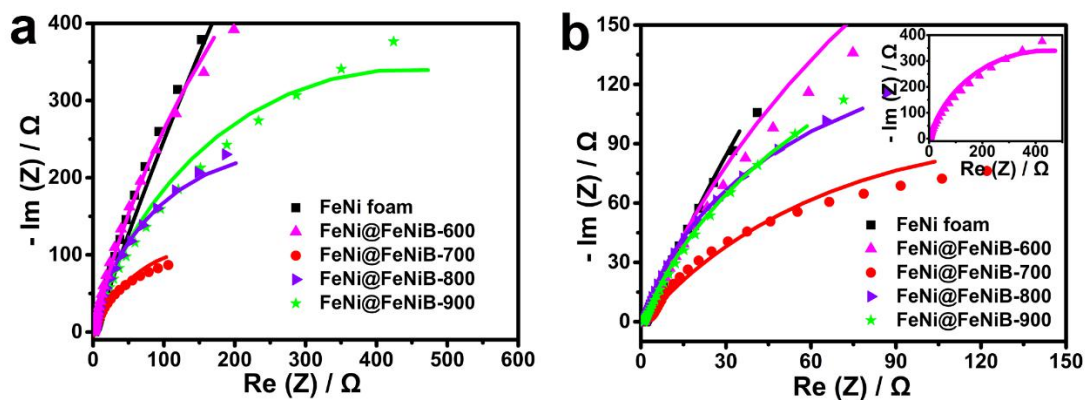

**Figure S11.** Nyquist plots of FeNi foam, FeNi@FeNiB-600, FeNi@FeNiB-700, FeNi@FeNiB-800 and FeNi@FeNiB-900 in 1.0 M KOH under the potentials of (a) 1.23 V (vs RHE) and (b) 1.40 V (vs RHE), respectively.

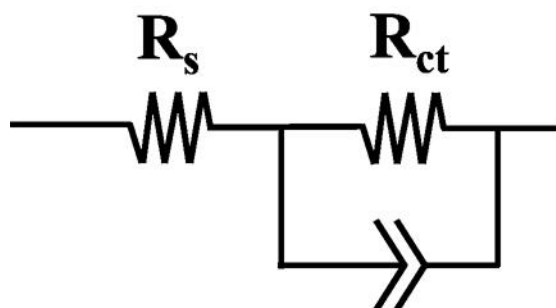

**Figure S12.** Equivalent circuit used for fitting the Nyquist plots.

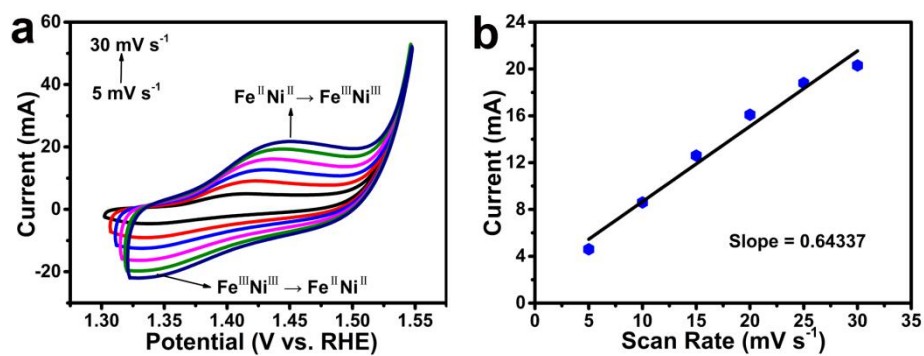

**Figure S13.** (a) Cyclic voltammograms of FeNi@FeNiB-700 at different scan rates increasing from 5  $\text{mV s}^{-1}$  to 30  $\text{mV s}^{-1}$  in 1.0 M KOH. (b) Corresponding plots of oxidation peak current versus scan rate on FeNi@FeNiB-700.

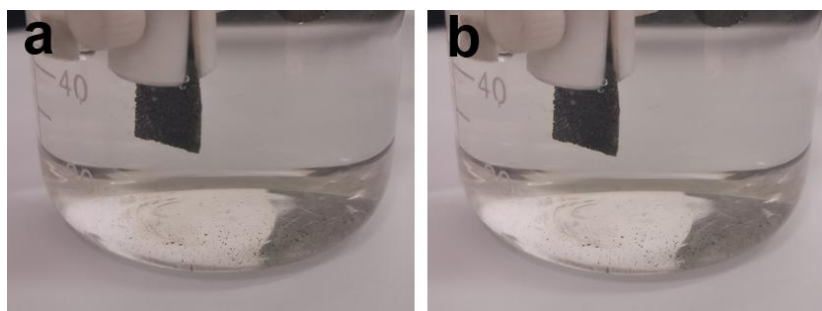

**Figure S14.** The digital images of electrolyte (a) before and (b) after long-term OER characterization.

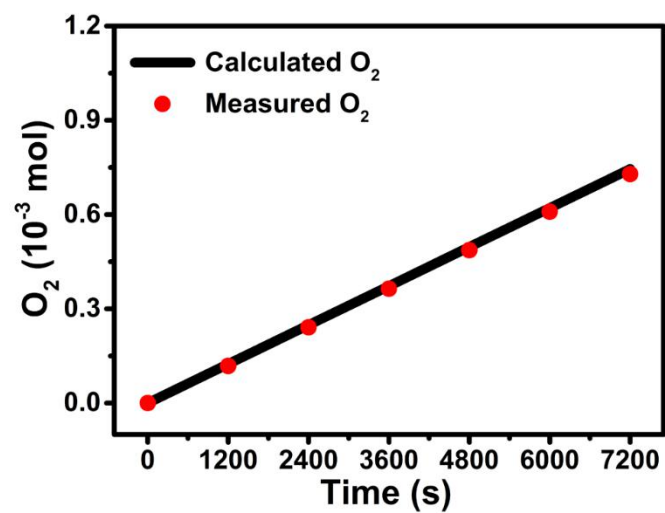

**Figure S15.** The amount of gas theoretically calculated and experimentally measured versus time for FeNi@FeNiB-700.



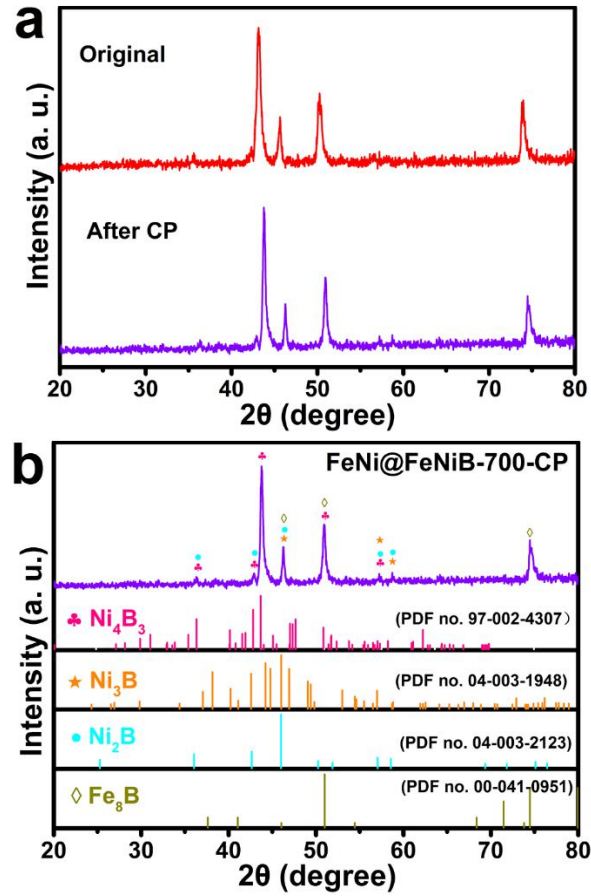

**Figure S16.** (a) Comparison of XRD spectra of original FeNi@FeNiB-700 and post-tested FeNi@FeNiB-700 with chronopotentiometric (CP) test for 12 h. (b) Detailed XRD pattern of FeNi@FeNiB-700-CP.



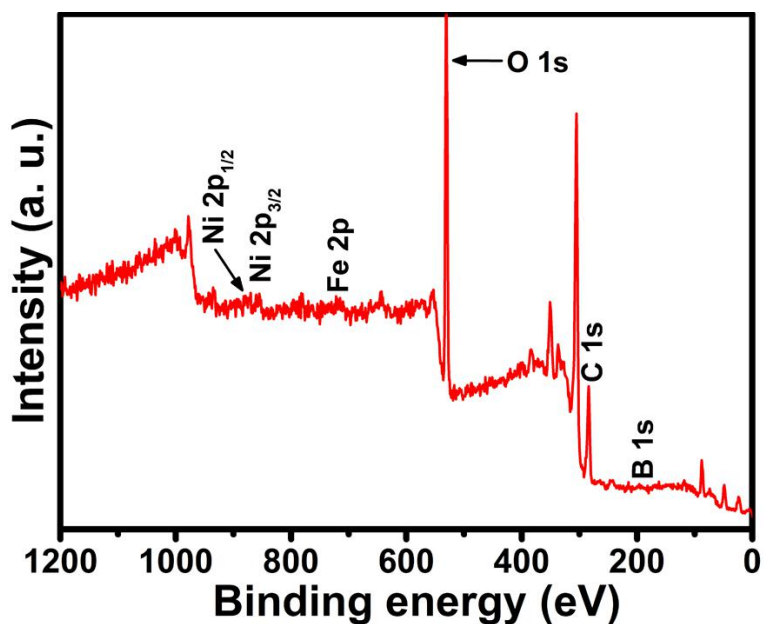

Figure S17. XPS survey profiles for FeNi@FeNiB-700 after OER stability test.

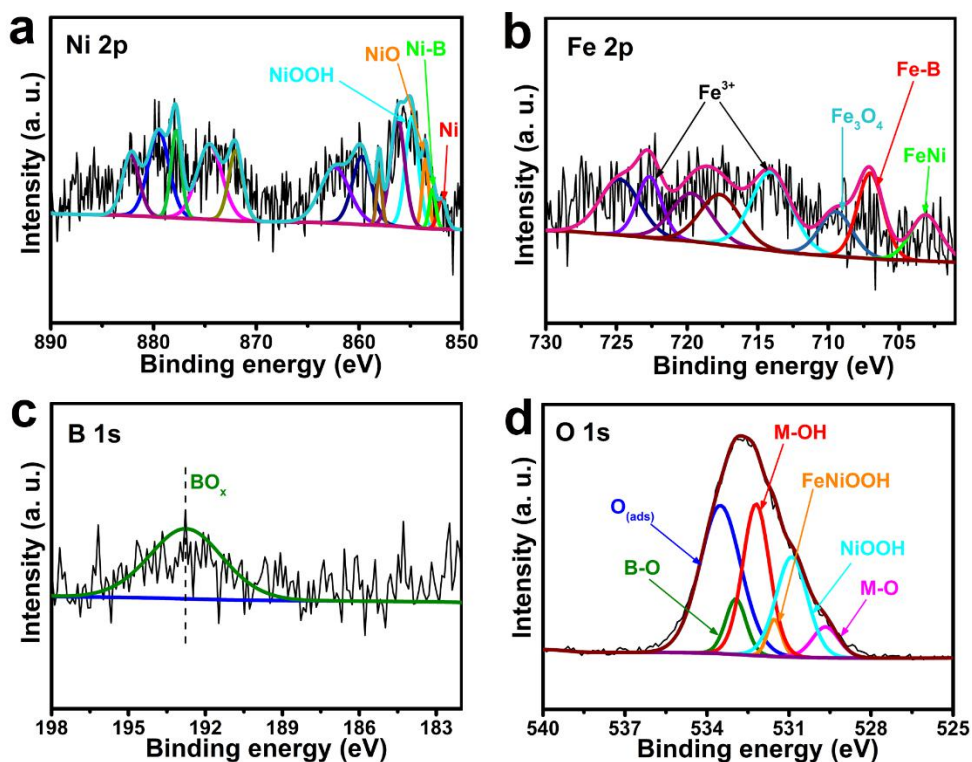

Figure S18. High resolution XPS spectra of the (a) Fe 2p, (b) Ni 2p, (c) B 1s and (d) O 1s for FeNi@FeNiB-700 after long-term stability test.

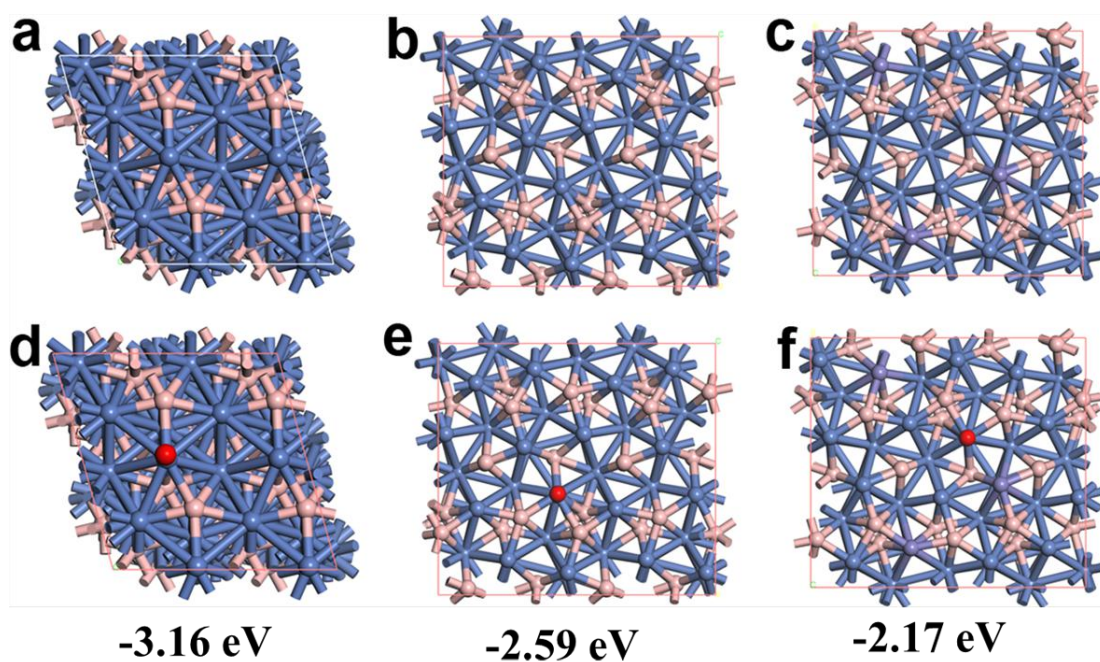

**Figure S19.** DFT calculations: (a-c) are the models of  $\text{Ni}_2\text{B}$ ,  $\text{Ni}_4\text{B}_3$  and  $\text{Fe-Ni}_4\text{B}_3$ ; (d-f) are the models of O-adsorbed  $\text{Ni}_2\text{B}$ ,  $\text{Ni}_4\text{B}_3$  and  $\text{Fe-Ni}_4\text{B}_3$ . (Blue: Ni, purple: Fe, pink: B, red: O)

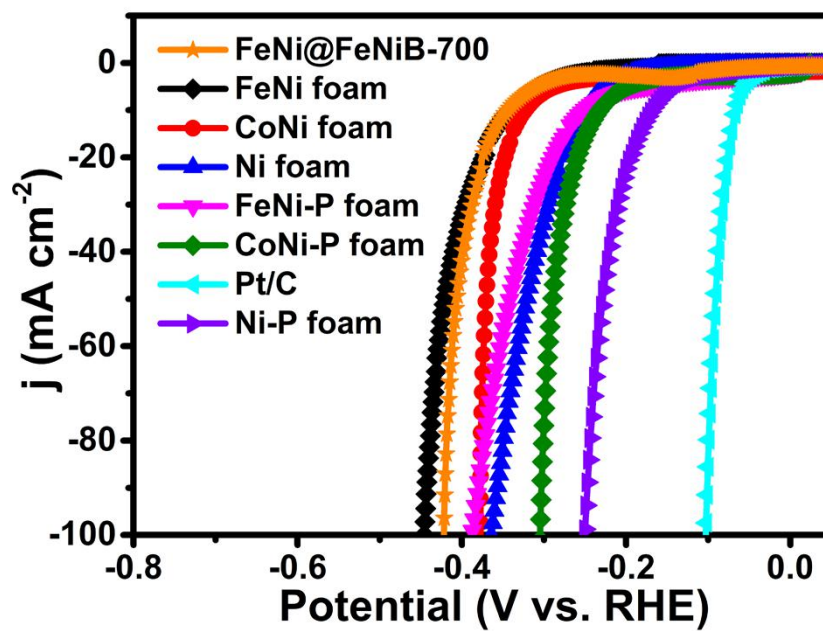

**Figure S20.** Polarization curves of FeNi@FeNiB-700, FeNi foam, CoNi foam, Ni foam, FeNi-P foam, CoNi-P foam, Ni-P foam and Pt/C toward the HER in 1.0 M KOH solution.

**Table S1** Comparison of Tafel slope and required overpotential at 10 mA cm<sup>-2</sup> ( $\eta_{10}$ ) for FeNi@FeNiB-700 with many of reported state-of-the-art noble-metal-free OER electrocatalysts in alkaline media.

| Catalysts                                  | $\eta_{10}$<br>(mV) | Tafel slope<br>(mV dec <sup>-1</sup> ) | Reference |
|--------------------------------------------|---------------------|----------------------------------------|-----------|
| FeNiB/FeNi<br>foam-700                     | 272                 | 89.2                                   | This work |
| porous Ni-P<br>foam                        | 220                 | 179.9                                  | [5]       |
| Ni <sub>2</sub> P                          | 290                 | 47                                     | [6]       |
| NiCo LDH<br>nanosheets                     | 367                 | 40                                     | [7]       |
| pc-Ni-B <sub>1</sub> @NB-2                 | 302                 | 52                                     | [8]       |
| Co <sub>2</sub> B-500/NG                   | 360                 | 45                                     | [9]       |
| Fe-Co-2.3Ni-B<br>nanoparticle              | 274                 | 38                                     | [10]      |
| $\gamma$ -CoOOH NS                         | 300                 | 38                                     | [11]      |
| Co <sub>4</sub> N NW/CC                    | 257                 | 44                                     | [12]      |
| Ni <sub>3</sub> S <sub>2</sub> /NF leaves  | 340                 | 150                                    | [13]      |
| CoSe <sub>2</sub> NS@CP                    | 350                 | 34.5                                   | [14]      |
| CoO-MoO <sub>2</sub>                       | 312                 | 69                                     | [15]      |
| EORC-activated<br>stainless steel<br>plate | 290                 | 32                                     | [16]      |

**Table S2** EIS parameters ( $R_s$  and  $R_{ct}$ ) of FeNi@FeNiB-X (X=600,700,800,900) at controlled-potentials of 1.23 V, 1.40 V and 1.50 V vs. RHE, respectively.

| sample             | 1.23 V        |                  | 1.40 V        |                  | 1.50 V        |                  |
|--------------------|---------------|------------------|---------------|------------------|---------------|------------------|
|                    | $R_s(\Omega)$ | $R_{ct}(\Omega)$ | $R_s(\Omega)$ | $R_{ct}(\Omega)$ | $R_s(\Omega)$ | $R_{ct}(\Omega)$ |
| FeNi foam          | 2             | 8910             | 1.832         | 1971             | 2.875         | 648.9            |
| FeNi@FeNi<br>B-600 | 0.787         | 2334             | 0.754         | 335.7            | 0.838         | 38.5             |
| FeNi@FeNi<br>B-700 | 0.846         | 328.79           | 1.059         | 35.03            | 0.493         | 25.16            |
| FeNi@FeNi<br>B-800 | 1.296         | 534.6            | 0.981         | 299.4            | 1.875         | 36.16            |
| FeNi@FeNi<br>B-900 | 1.705         | 1061             | 1.066         | 415.4            | 2.232         | 111.6            |

**Table S3** Quantitative analysis of original FeNi@FeNiB-700 and post-tested FeNi@FeNiB-700 for 12 h from XPS measurements.

|            | Ni (at. %) | Fe (at. %) | B (at. %) | O (at. %) |
|------------|------------|------------|-----------|-----------|
| Before OER | 5.24       | 2.26       | 31.81     | 60.69     |
| After OER  | 3.15       | 2.43       | 3.40      | 91.01     |

## Reference

- [1] G. Kresse, J. Furthmüller, *Phys. Rev. B* **1996**, *54*, 11169.
- [2] H. J. Meng, W. J. Zhang, Z. Z. Ma, F. Zhang, B. Tang, J. P. Li, X. G. Wang, *ACS Appl. Mater. Interfaces* **2018**, *10*, 2430–2441.
- [3] W. J. Zhang, J. Zheng, X. D. Gu, B. Tang, J. P. Li, X. G. Wang, *Nanoscale* **2019**, *11*, 9353-9361.
- [4] J. P. Perdew, K. Burke, M. Ernzerhof, *Phys. Rev. Lett.* **1996**, *77*, 3865-3868.
- [5] X. G. Wang, W. Li, D. H. Xiong, L. F. Liu, *J. Mater. Chem. A* **2016**, *4*, 5639–5646.
- [6] E. J. Popczun, J. R. McKone, C. G. Read, A. J. Biacchi, A. M. Wiltrout, N. S. Lewis, R. E. Schaak, *J. Am. Chem. Soc.* **2013**, *135*, 9267-9270.
- [7] H. F. Liang, F. Meng, M. Caban-Acevedo, L. Li, A. Forticaux, L. Xiu, Z. C. Wang, S. Jin, *Nano Lett.* **2015**, *15*, 1421-1427.
- [8] W. J. Jiang, S. Niu, T. Tang, Q. H. Zhang, X. Z. Liu, Y. Zhang, Y. Y. Chen, J. H. Li, L. Gu, L. J. Wan, J. S. Hu, *Angew. Chem. Int. Ed.* **2017**, *56*, 6572-6577.
- [9] J. Masa, P. Weide, D. Peeters, I. Sinev, W. Xia, Z. Y. Sun, C. Somsen, M. Muhler, W. Schuhmann, *Adv. Energy Mater.* **2016**, *6*, 1502313.
- [10] J. M. V. Nsanzimana, Y. Peng, Y. Y. Xu, L. Thia, C. Wang, B. Y. Xia, X. Wang, *Adv. Energy Mater.* **2018**, *8*, 1701475.
- [11] H. T. Wang, H. W. Lee, Y. Deng, Z. Y. Lu, P. C. Hsu, Y. Y. Liu, D. C. Lin, Y. Cui, *Nat. Commun.* **2015**, *6*, 7261.
- [12] P. Z. Chen, K. Xu, Z. W. Fang, Y. Tong, J. C. Wu, X. L. Lu, X. Peng, H. Ding, C. Z. Wu, Y. Xie, *Angew. Chem.* **2015**, *54*, 14710-14714.
- [13] T. Zhu, L. L. Zhu, J. Wang, G. W. Ho, *J. Mater. Chem. A* **2016**, *4*, 13916.
- [14] Y. Zhou, H. Q. Xiao, S. Zhang, Y. P. Li, S. T. Wang, Z. J. Wang, C. H. An, J. Zhang, *Electrochim. Acta* **2017**, *241*, 106-115.
- [15] F. L. Lyu, Y. C. Bai, Z. W. Li, W. J. Xu, Q. F. Wang, J. Mao, L. Wang, X. W. Zhang, Y. D. Yin, *Adv. Funct. Mater.* **2017**, *27*, 1702324.
- [16] H. X. Zhong, J. Wang, F. L. Meng, X. B. Zhang, *Angew. Chem. Int. Ed.* **2016**, *55*, 9937-9941.
